# Supplementary material for: Primary Care Practitioner Perspectives on the Role of Primary Care in Dementia Diagnosis and Care
Source: PubMed Central journal article supplement (PMC10539983; doi:10.1001/jamanetworkopen.2023.36030), 2023-09-28
Supplement: jamanetwopen-e2336030-s002.pdf [file jamanetwopen-e2336030-s002.pdf]

## Data Sharing Statement

Sideman. Primary Care Provider Perspectives on the Role of Primary Care in Dementia Diagnosis and Care. *JAMA Netw Open*. Published September 27, 2023.  
doi:10.1001/jamanetworkopen.2023.36030

### Data

**Data available:** No
